# Supplementary material
Source: PubMed Central journal article supplement (PMC3347654)
Supplement: supp_2011.052779_2011_052779-Contributions.pdf [file supp_2011.052779_2011_052779-Contributions.pdf]

**Manuscript no. HAEMATOL/2011/052779 entitled “AMD3100 disrupts the cross-talk between chronic lymphocytic leukemia cells and a mesenchymal stromal or nurse-like cell -based microenvironment: preclinical evidence for its association with chronic lymphocytic leukemia treatments“**

**Authors: Stamatopoulos B, Meuleman N, De Bruyn C, Pieters K, Mineur P, Le Roy C, Saint-Georges S, Varin-Blank N, Cymbalista F, Bron D, Lagneaux L.**

**Information about the contributions of each person named as having participated in the study**

**1) Guarantor(s)**, i.e., person(s) who is (are) responsible for the integrity of the work as a whole:

- Basile Stamatopoulos, Laboratory of Clinical Cell Therapy, J. Bordet Institute, Brussels, Belgium, bstamato@ulb.ac.be
- Laurence Lagneaux, Laboratory of Clinical Cell Therapy, J. Bordet Institute, Brussels, Belgium, laurence.lagneaux@bordet.be

According to the International Committee of Medical Journal Editors (ICMJE)

([http://www.icmje.org/ethical\\_1author.html](http://www.icmje.org/ethical_1author.html)): “*Authorship credit should be based on: 1) substantial contributions to conception and design, acquisition of data, or analysis and interpretation of data; 2) drafting the article or revising it critically for important intellectual content; and 3) final approval of the version to be published. Authors should meet conditions 1, 2, and 3 ..... Acquisition of funding, collection of data, or general supervision of the research group alone does not constitute authorship*”.

The guarantors of this manuscript confirm that all persons designated as authors qualify for authorship, and that each author has participated sufficiently in the work to take public responsibility for appropriate portions of the content.

2) Authors who participated in the **conception of the study**: All authors participated to the conception of the study

3) **Design & Methods**. The following authors were responsible for specific investigations

- Basile Stamatopoulos was responsible for cell culture experiment, statistics, acquisition of the data, and interpretation of the data
- Laurence Lagneaux was responsible for MSC culture
- Cécile De Bruyn was responsible for flow cytometry experiment
- All other co-authors design, acquisition of data, or analysis and interpretation of data

4) **Results**. The following authors were responsible for specific portions of the results, including figures and tables:

- Basile Stamatopoulos was responsible for all tables and all figures

5) **Writing the manuscript**. The following authors were responsible for writing the manuscript:

- Basile Stamatopoulos and Laurence Lagneaux were responsible for the discussion.
- All others co-authors read, revised the manuscript critically for important intellectual content

6) **Contributors Listed in Acknowledgments**: -
